# Supplementary material for: Porous peony-like α-Fe2O3 hierarchical micro/nanostructures: synthesis, characterization and its lithium storage properties
Source: Royal Society of Chemistry journal article supplement (doi:10.1039/c4ra06709f), 2014-01-01
Supplement: c4ra06709f1.pdf [file c4ra06709f1.pdf]

**Porous Peony-like  $\alpha$ -Fe<sub>2</sub>O<sub>3</sub> Hierarchical  
Micro/nanostructures: Synthesis, Characterization and its  
Lithium Storage Properties**

*Tao Yang, Yangai Liu\*, Zhaohui Huang\*, Qian Yang, Yongbo Chen, Meiling Hu,*

*Ming Guan, Minghao Fang*

School of Materials Science and Technology, China University of Geosciences

(Beijing), Beijing 100083, P.R. China

**Supporting Information**

---

\* Corresponding author: Y. G. Liu, Tel.: +86-010-82322186, Fax: +86-010-82322186.  
E-mail address: liuyang@cugb.edu.cn.

\* Corresponding author: Z. H. Huang, Tel.: +86-010-82322186, Fax: +86-010-82322186.  
E-mail address: huang118@cugb.edu.cn.

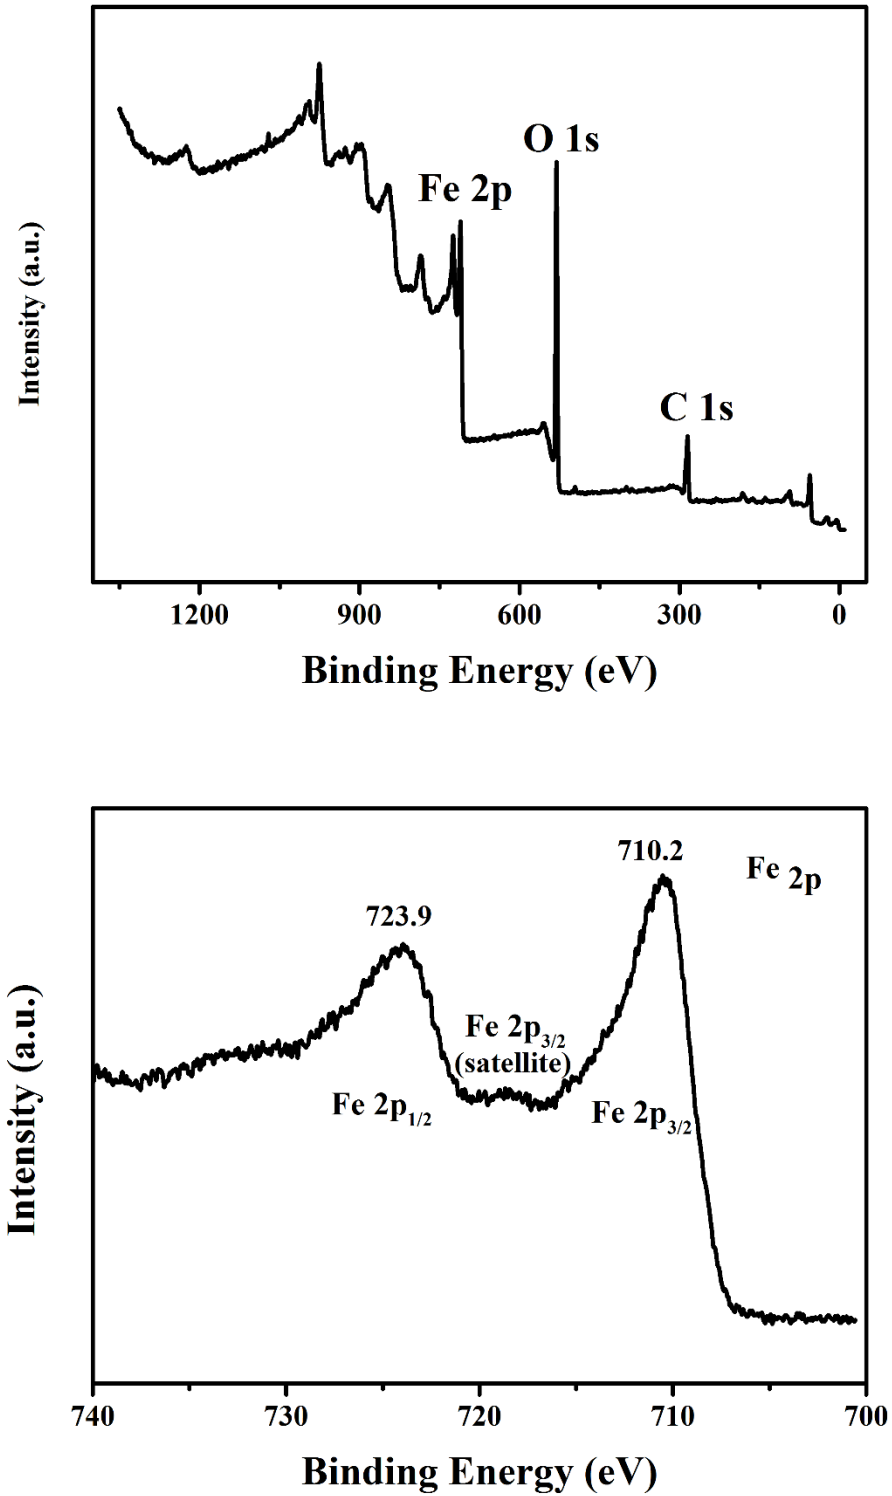

**Figure S1** X-ray photoelectron spectroscopy of peony-like FeCO<sub>3</sub> microflowers: a) the survey scan, and high resolution scans of the iron edges.

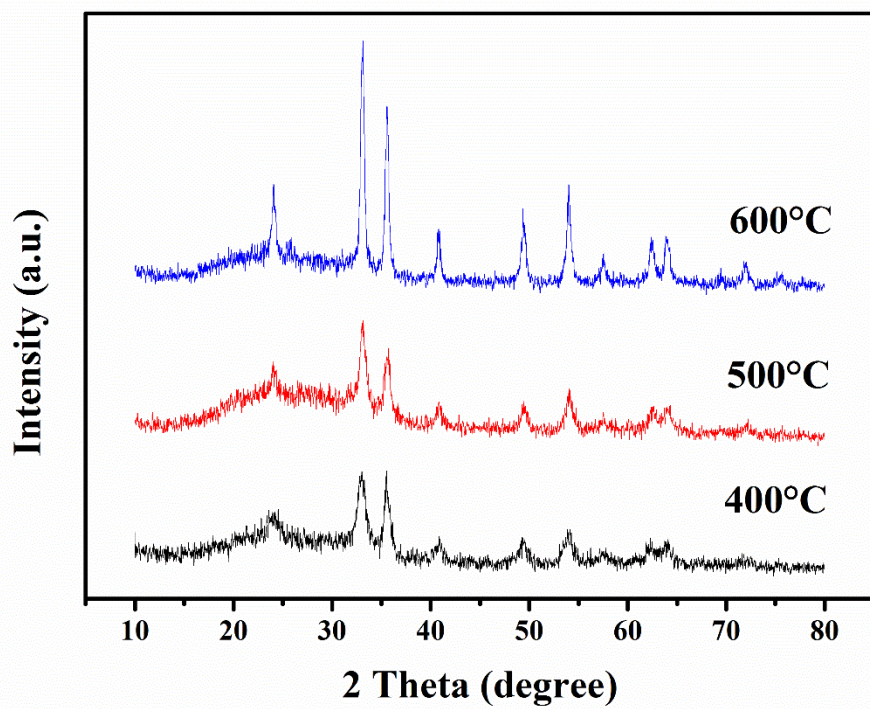

Figure S2 XRD patterns of the products heated at different temperature.

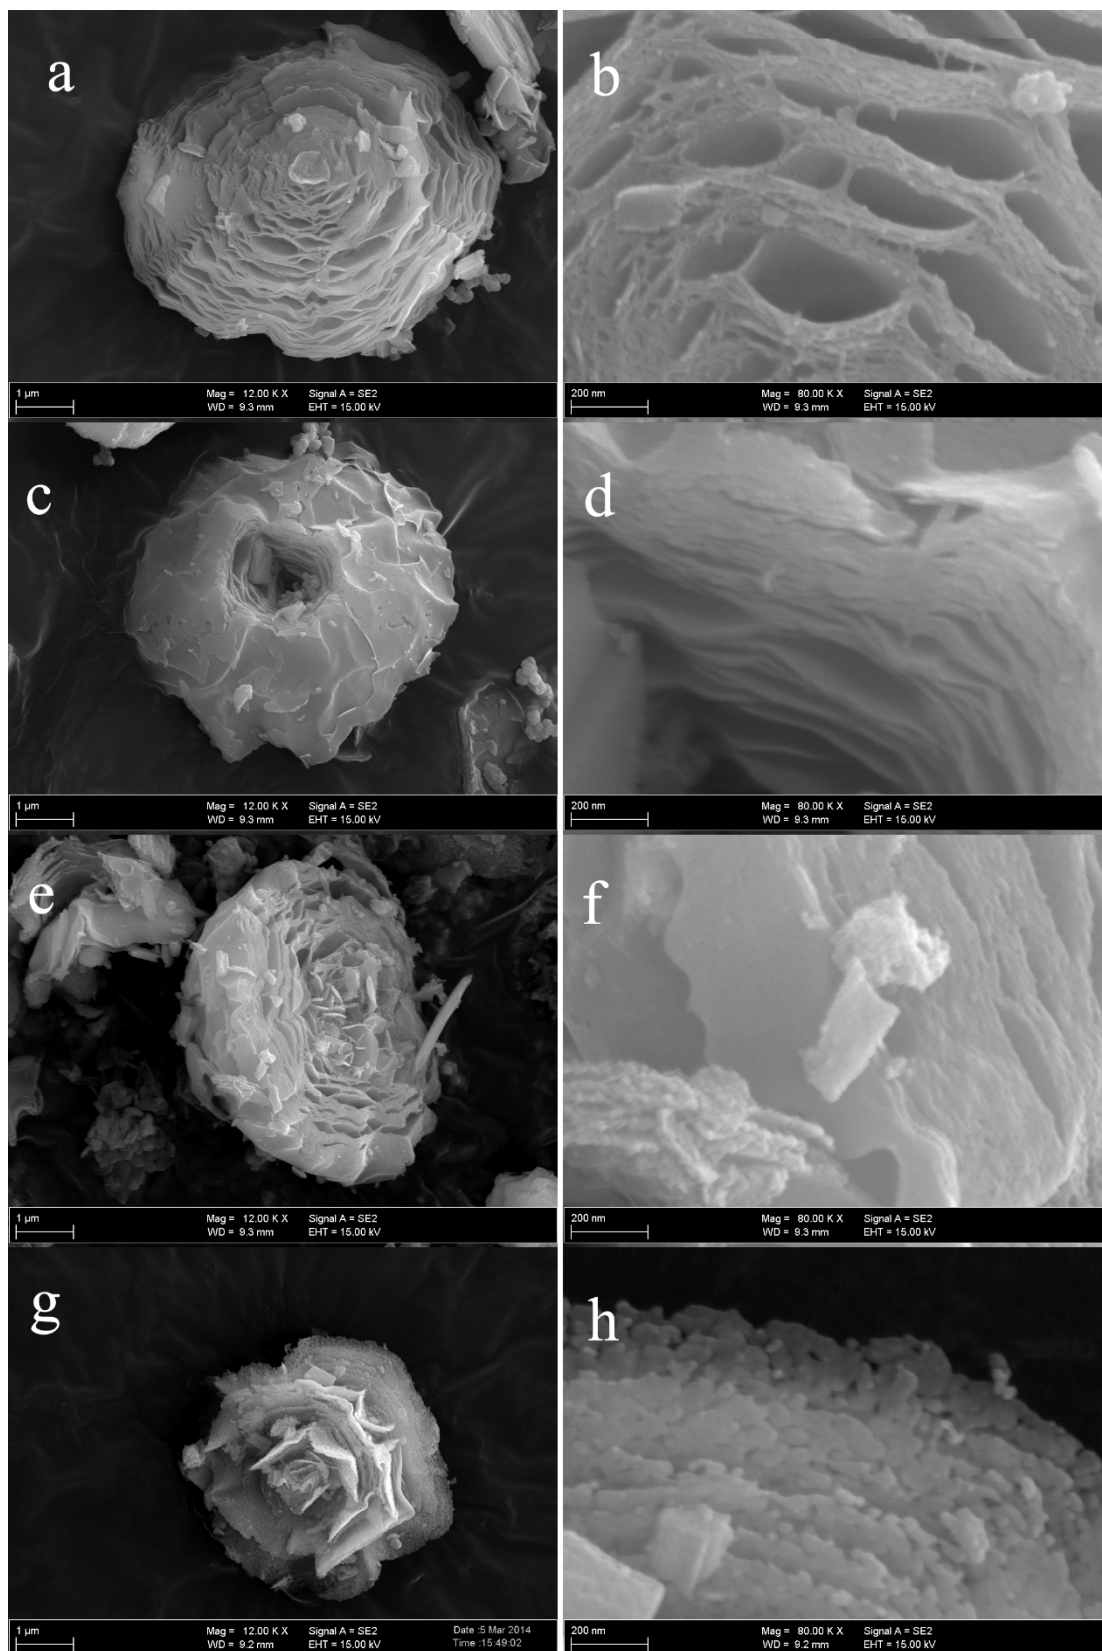

**Figure S3** SEM images of the products heated at different temperature: (a-d) 400 °C; (e, f) 500 °C; (g, h) 600 °C.

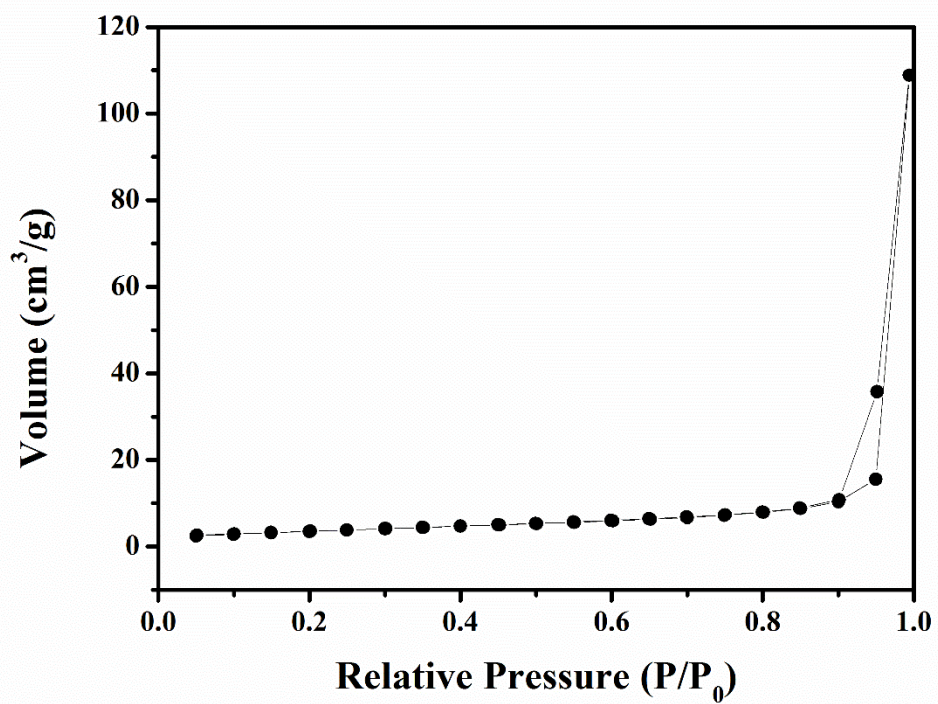

**Figure S3** BET nitrogen adsorption–desorption isotherms for hierarchical  $\alpha$ - $\text{Fe}_2\text{O}_3$  microflowers.
